# Supplementary material
Source: PubMed Central journal article supplement (PMC7099135)
Supplement: JB.00559-19-s0002.pdf [file JB.00559-19-s0002.pdf]

1

### SUPPLEMENTAL FIGURES

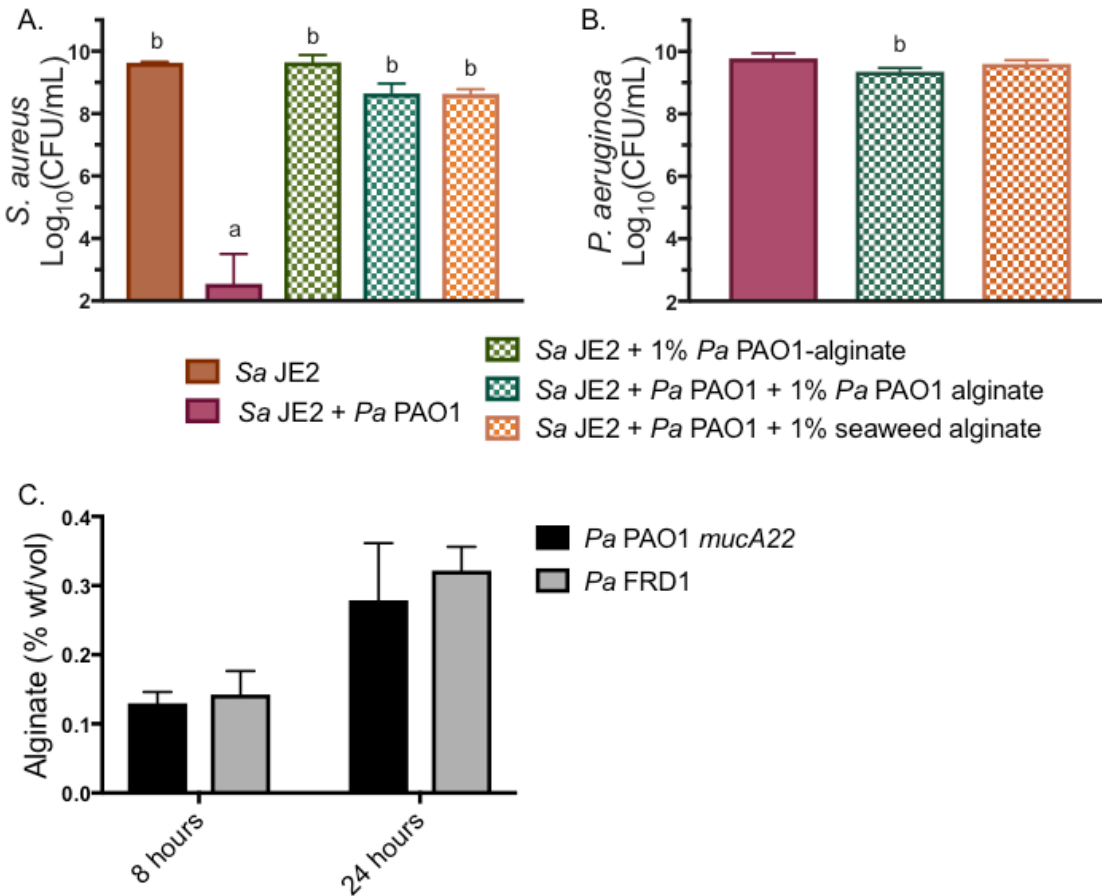

2

3 **Figure S1. Exogenous alginate protects *S. aureus* JE2 from *P. aeruginosa* PAO1 in co-culture.**

4 **A)** *S. aureus* JE2 and **B)** *P. aeruginosa* PAO1 growth after 8 hours of liquid co-culture in TSB +/-

5 1% seaweed-derived or *P. aeruginosa* PAO1-derived alginate. CFU/ml were enumerated and

6 log<sub>10</sub> transformed. Dashed boxes indicate the presence of alginate in the culture. Significance

7 was determined by one-way ANOVA with Dunnett's post-test. a, p<0.0001 with *S. aureus* JE2 as

8 the reference. b, p<0.0001 for panel **A** and p<0.05 for panel **B** with *P. aeruginosa* PAO1 + *S.*

9 *aureus* JE2 as the reference. **C)** Alginate production by mucoid strain *P. aeruginosa* PAO1

10 *mucA22* and mucoid clinical isolate *P. aeruginosa* FRD1 after 8 and 24 hours liquid culture in

11 flasks.

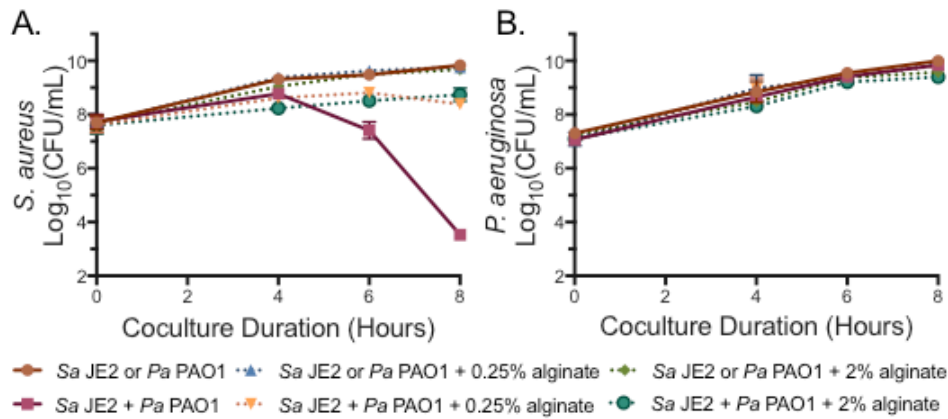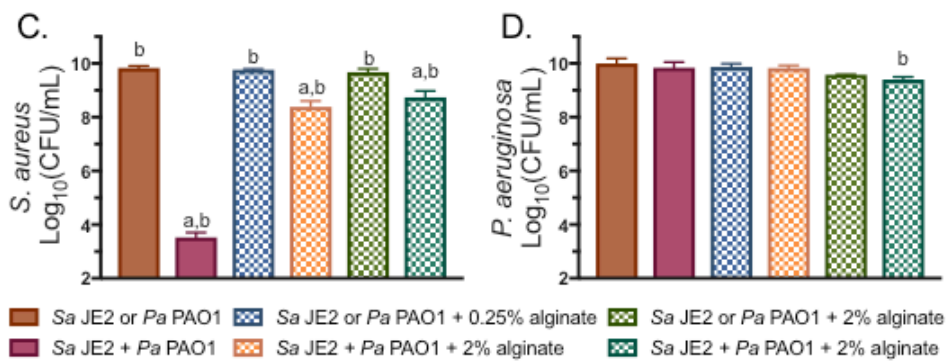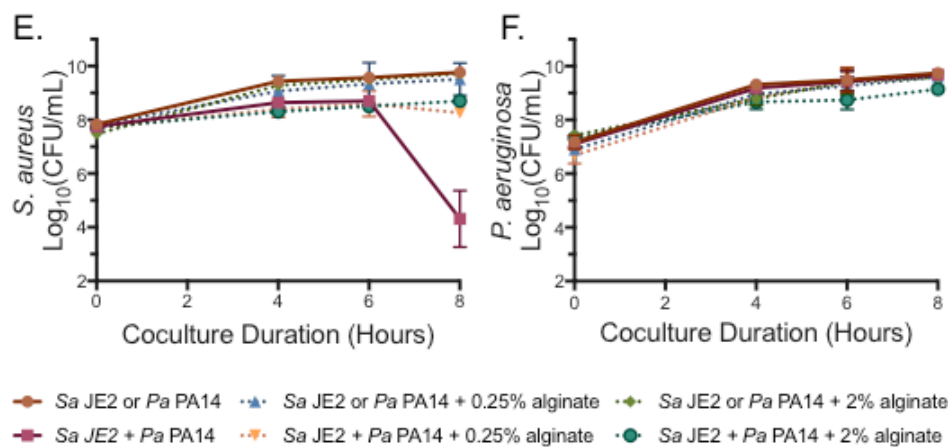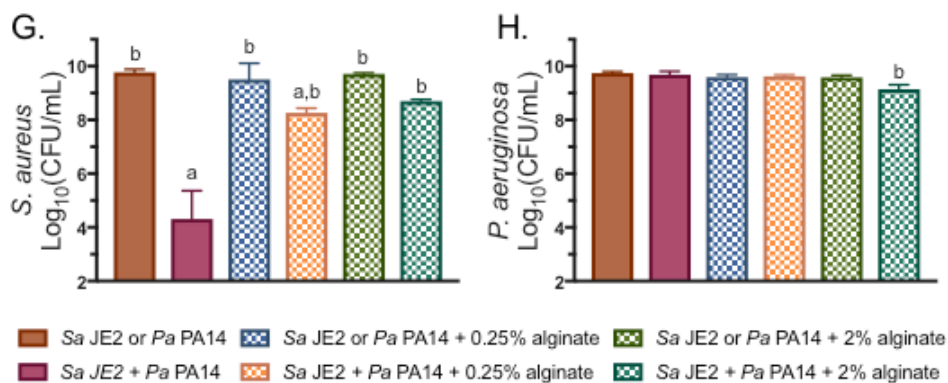

13 **Figure S2. Exogenous alginate protects *S. aureus* JE2 from *P. aeruginosa* in co-culture.**

14 Liquid co-cultures of *S. aureus* JE2 and *P. aeruginosa* in TSB +/- seaweed-derived alginate added

15 at 0.25% or 2%. CFU/ml were log<sub>10</sub> transformed. **A)** *S. aureus* JE2 and **B)** *P. aeruginosa* PAO1

16 growth curves over 8 hours in monoculture or the indicated co-cultures. CFU/ml were

17 enumerated at indicated time points. **C)** *S. aureus* JE2 and **D)** *P. aeruginosa* PAO1 growth after 8

18 hours. **E)** *S. aureus* JE2 and **F)** *P. aeruginosa* PA14 growth curves over 8 hours. CFU/ml were

19 enumerated at indicated time points. **G)** *S. aureus* JE2 and **H)** *P. aeruginosa* PA14 growth after 8

20 hours. Dotted lines/dashed boxes indicate the presence of alginate in the culture. Significance

21 was determined by one-way ANOVA with Dunnett's post-test. a, p<0.05 with *S. aureus* JE2 as

22 the reference. b, p<0.001 with *P. aeruginosa* + *S. aureus* JE2 as the reference.

23

24

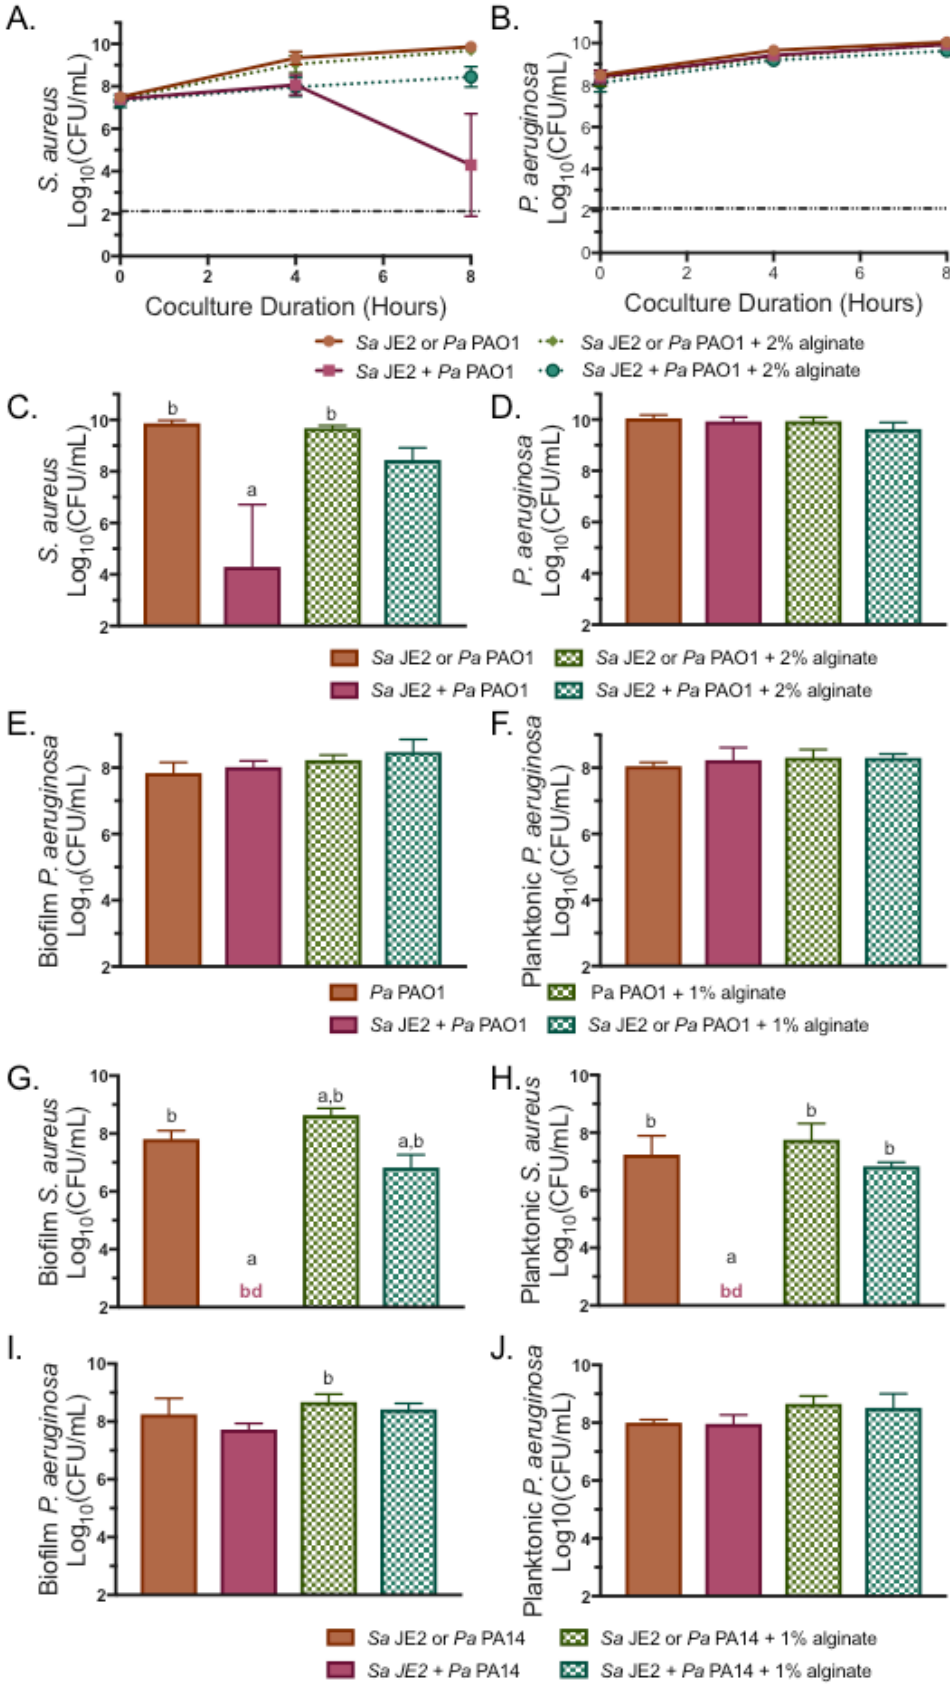

26 **Figure S3. Exogenous alginate protects *S. aureus* JE2 from *P. aeruginosa* in co-culture.**

27 **A-D)** Liquid co-cultures of *S. aureus* JE2 and *P. aeruginosa* PAO1 in TSB +/- seaweed-derived

28 alginate added at 0.25% or 2%. *P. aeruginosa* initial density was 10X higher than *S. aureus*

29 density based on OD<sub>600</sub>. CFU/ml were log<sub>10</sub> transformed. **A)** *S. aureus* JE2 and **B)** *P. aeruginosa*

30 PAO1 growth curves over 8 hours. CFU/ml were enumerated at indicated time points. The

31 dashed line at 2 indicates the limit of detection. **C)** *S. aureus* JE2 and **D)** *P. aeruginosa* PAO1

32 growth after 8 hours. **E-F)** Biofilm co-cultures of *P. aeruginosa* PAO1 and *S. aureus* JE2 for 16 hrs

33 in MEM L-gln L-arg +/- 1% seaweed-derived alginate. CFU/ml were enumerated and log<sub>10</sub>

34 transformed. *P. aeruginosa* PAO1 **E)** biofilm and **F)** planktonic growth. **G-J)** Biofilm co-cultures

35 of *P. aeruginosa* PA14 and *S. aureus* JE2 for 16 hours in MEM L-gln L-arg +/- 1% seaweed-

36 derived alginate. CFU/ml were enumerated and log<sub>10</sub> transformed. *S. aureus* JE2 **G)** biofilm and

37 **H)** planktonic and *P. aeruginosa* PA14 **I)** biofilm and **J)** planktonic growth. Dotted lines/dashed

38 boxes indicate the presence of alginate in the culture. Significance was determined by one-way

39 ANOVA with Dunnett's post-test. a, p<0.05 with *S. aureus* JE2 as the reference. b, p<0.05 with

40 *P. aeruginosa* + *S. aureus* JE2 as the reference.

41

42

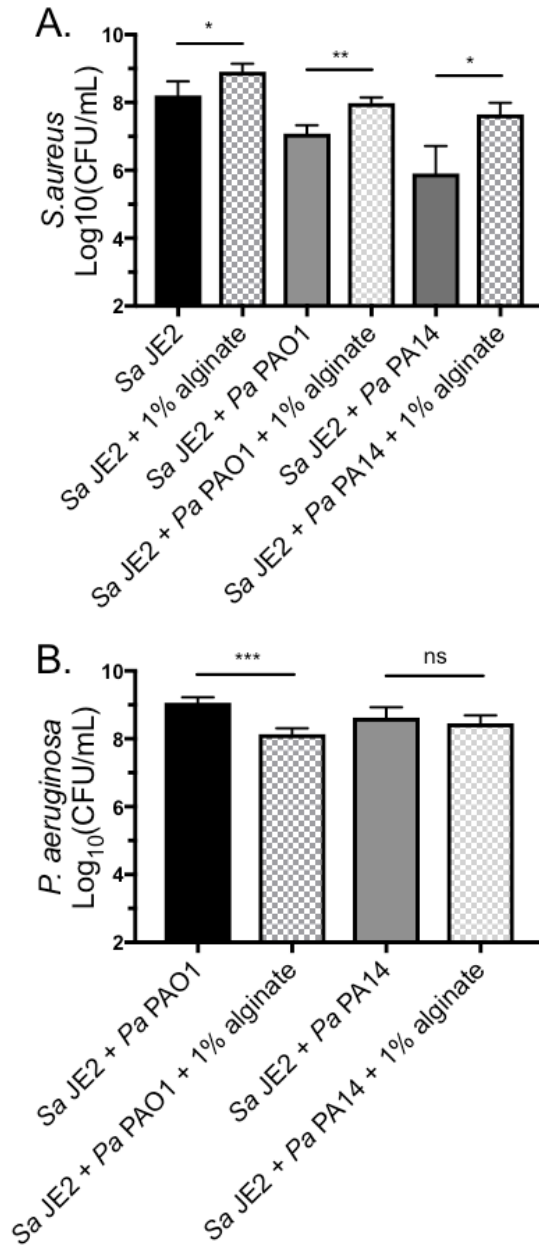

43

44 **Figure S4. Exogenous alginate protects *S. aureus* JE2 from *P. aeruginosa* in minimal medium**

45 **liquid co-culture. A) *S. aureus* JE2 and B) *P. aeruginosa* PAO1 and *P. aeruginosa* PA14 growth**

46 after 20 hours co-culture in 1/2X MEM L-gln L-arg +/- 1% alginate. CFU/ml were enumerated

47 and log<sub>10</sub> transformed. Significance determined by unpaired t-test. \*p<.05, \*\*p<.01, \*\*\*p<.001.

48

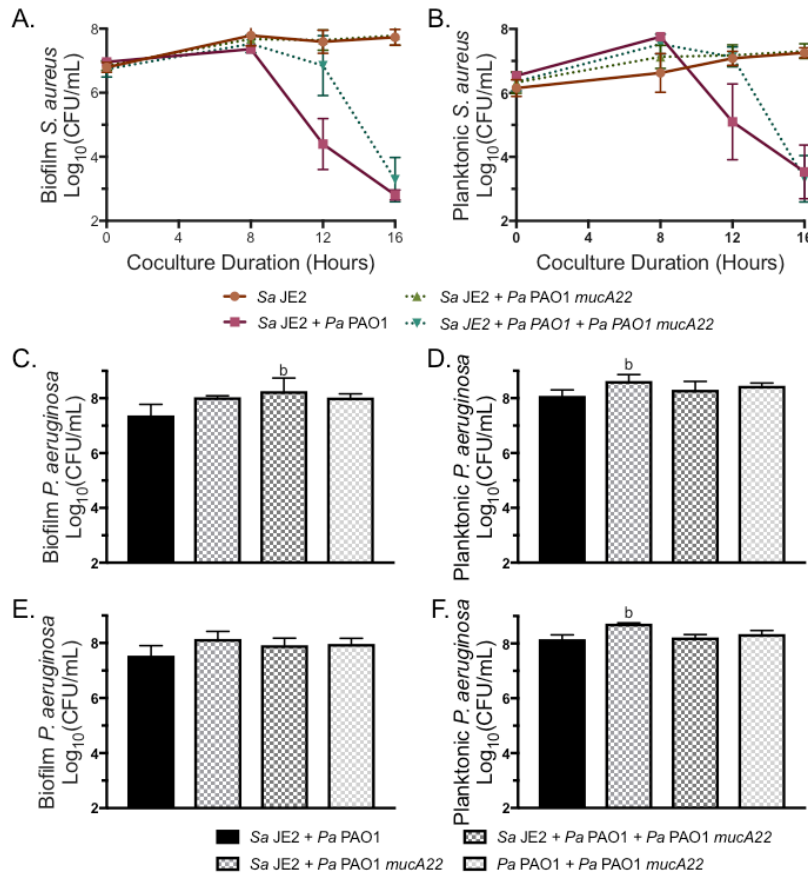

49 **Figure S5. Culture with mucoid *P. aeruginosa* PAO1 *mucA22* delays *S. aureus* JE2 killing by**  
50 **wild-type *P. aeruginosa* PAO1.** Biofilm tri-culture on plastic with *S. aureus* JE2, *P. aeruginosa*  
51 PAO1, and *P. aeruginosa* PAO1 *mucA22* in MEM L-gln L-arg. CFU/ml were enumerated on MSA  
52 and log<sub>10</sub> transformed. Growth curve of *S. aureus* JE2 viability in the **A)** biofilm and **B)**  
53 planktonic fraction. Dashed lines indicate the presence of a mucoid strain in the culture. *P.*  
54 *aeruginosa* PAO1 growth in the **C)** biofilm and **D)** planktonic fraction after 12 hours and *P.*  
55 *aeruginosa* PAO1 growth in the **E)** biofilm and **F)** planktonic fraction after 16 hours co-culture.  
56 Dashed boxes indicate the presence of a mucoid strain in the culture. Significance was  
57 determined by one-way ANOVA with Dunnett's post-test. a, p<0.05 with *S. aureus* JE2 as the  
58 reference. b, p<0.05 with *P. aeruginosa* PAO1 + *S. aureus* JE2 as the reference.

A.

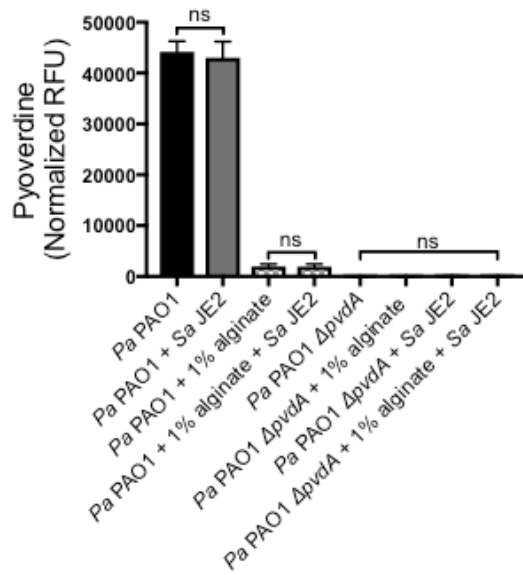

B.

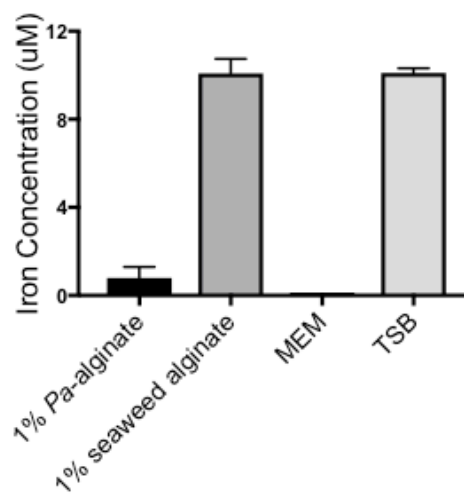

C.

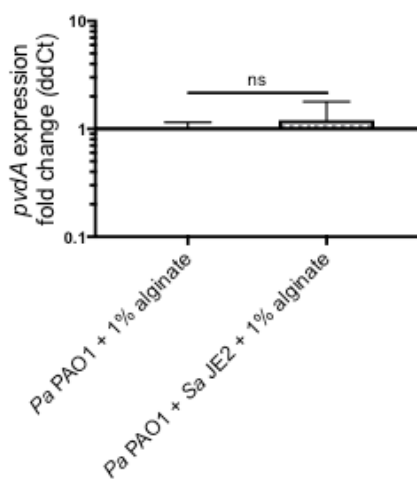

D.

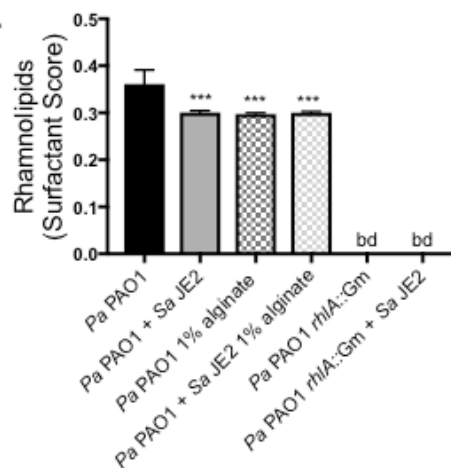

E.

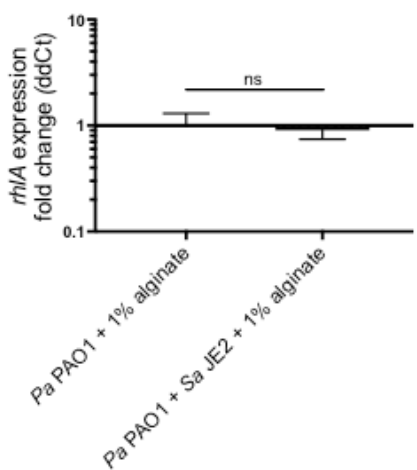



61 **Figure S6. Contributions of *S. aureus* and iron in alginate co-cultures. A)** *P. aeruginosa* PAO1  
62 was grown on plastic in 1/2X MEM L-gln L-arg +/- 1% alginate for 16 hours at 37°C with 5% CO<sub>2</sub>.  
63 Supernatants were collected from the planktonic fraction. Pyoverdine was quantified by  
64 measuring RFU of the supernatants at 400 nm excitation and 460 nm emission and normalizing  
65 to CFU/mL of the planktonic fraction. **B)** Iron was quantified in MEM L-gln, TSB, and seaweed  
66 alginate. For alginate, µg/g quantifications were converted to µM that 1% alginate contributes  
67 to the solution. **C-E)** *P. aeruginosa* PAO1 was grown in TSB in liquid culture for 8 hours +/- 1%  
68 alginate. Supernatants were collected by centrifuging to remove cell debris, and sterile filtering.  
69 Cell pellets were snap frozen for expression analyses. **C)** *pvdA* expression was quantified by q-  
70 RT-PCR and ddCt was calculated relative to *P. aeruginosa* PAO1 + 1% alginate *rpoD* expression.  
71 Significance for four biological replicates was measured by paired t-test. ns, not significant. **D)**  
72 Rhamnolipid production by *P. aeruginosa* PAO1 quantified by drop collapse and normalized to  
73 CFU/mL to determine surfactant score. Significance determined by one-way ANOVA with  
74 Dunnett's post-test comparison to *P. aeruginosa* PAO1. \*p>0.05, \*\*p<0.01, \*\*\*p<0.001,  
75 \*\*\*\*p<0.0001. **E)** *rhlA* expression was quantified by q-RT-PCR and ddCt was calculated relative  
76 to *P. aeruginosa* PAO1 + 1% alginate *rpoD* expression. Significance for three biological replicates  
77 was measured by paired t-test. ns, not significant.

78

79

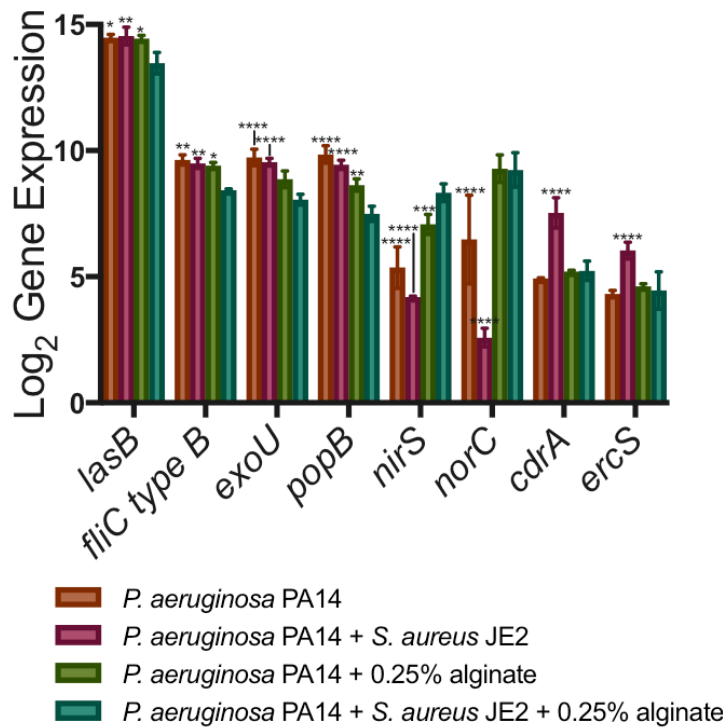

80 **Figure S7. Gene expression patterns of significantly differentially expressed *P. aeruginosa***  
 81 **transcripts.** Expression of genes identified in Figure 7 C-D to be differentially expressed in the  
 82 presence of alginate. Gene expression was analyzed by two-way ANOVA followed by Tukey's  
 83 multiple comparisons. All displayed statistical comparisons are in reference to *P. aeruginosa*  
 84 PAO1 + *S. aureus* JE2 + 0.25% alginate. All statistical data is available in supplemental table 4. \*  
 85  $p < 0.05$ , \*\* $p < 0.01$ , \*\*\* $p < 0.001$ , \*\*\*\* $p < 0.0001$ .

86

87

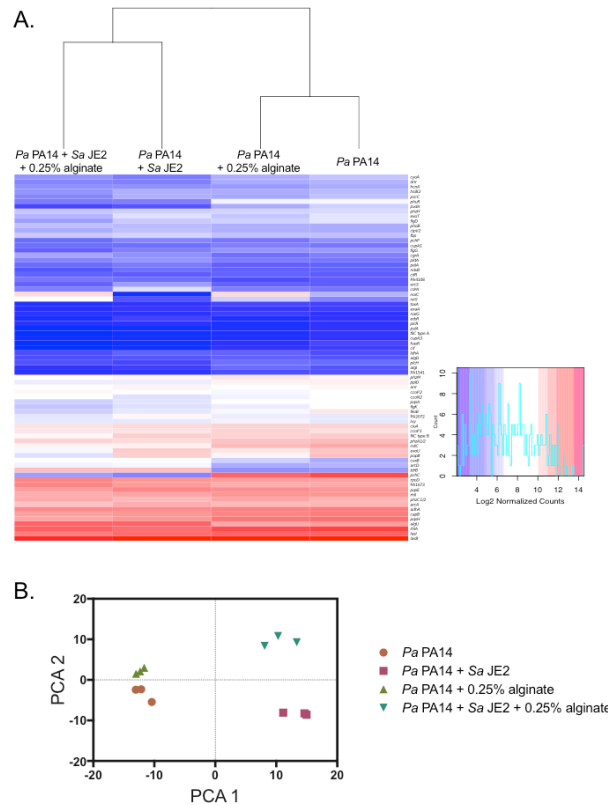

88 **Figure S8. *P. aeruginosa* PA14 gene expression changes in response to *S. aureus* JE2 and**  
 89 **alginate.** Transcriptional profiling of *P. aeruginosa* by Nanostring revealed that the presence of  
 90 *S. aureus* has a stronger impact on overall *P. aeruginosa* gene expression than exogenous  
 91 alginate. *P. aeruginosa* PA14 was cultured for 8 hours in TSB +/- 0.25% alginate and +/- *S.*  
 92 *aureus* JE2. Nanostring counts were normalized to positive controls and three housekeeping  
 93 genes (*rpoD*, *ppiD*, *fbp*) and log<sub>2</sub> transformed. **A)** Clustering by Euclidean distance of the average  
 94 of three biological replicates. Image was generated in R with the Heatmap.2 function. **B)**  
 95 Principal component analysis of all biological replicates. Samples separate more strongly on the  
 96 presence of *S. aureus* (PCA 1) than on the presence of exogenous alginate (PCA 2). However,  
 97 this clustering disappears when iron-acquisition genes are removed from the analysis (data not  
 98 shown).  
 99

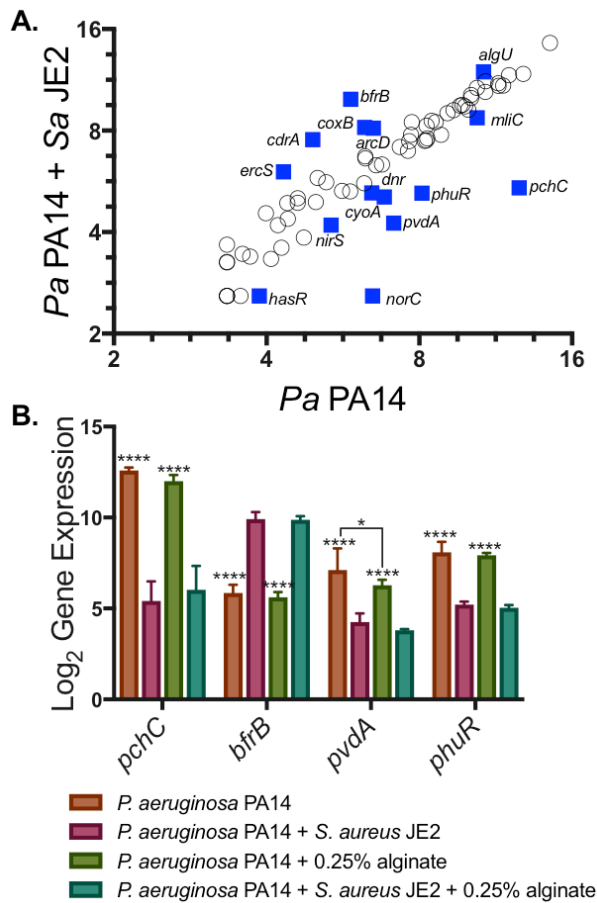

100 **Figure S9. *S. aureus* alters the expression of *P. aeruginosa* iron acquisition genes.** Raw  
 101 Nanostring counts were normalized to positive controls and three housekeeping genes (*rpoD*,  
 102 *ppiD*, *fbp*) and  $\text{log}_2$  transformed. Three biological replicates per condition. **A)** Significantly  
 103 differentially expressed genes were determined by unpaired *t*-test followed by the two-stage  
 104 linear step-up procedure of Benjamini, Krieger, and Yekutieli (with *q* 1% for false discovery), and  
 105 are marked by blue squares and labeled with the gene name. **B)** Iron acquisition genes with the  
 106 largest expression changes between *P. aeruginosa* PA14 and *P. aeruginosa* PA14 + *S. aureus*  
 107 JE2. \*  $p < 0.05$ , \*\*  $p < 0.01$ , \*\*\*  $p < 0.001$ , \*\*\*\*  $p < 0.0001$ . All displayed statistical comparisons are in  
 108 reference to the *P. aeruginosa* PAO1 + *S. aureus* JE2 condition unless otherwise indicated. All  
 109 statistical data is available in supplemental table 4.

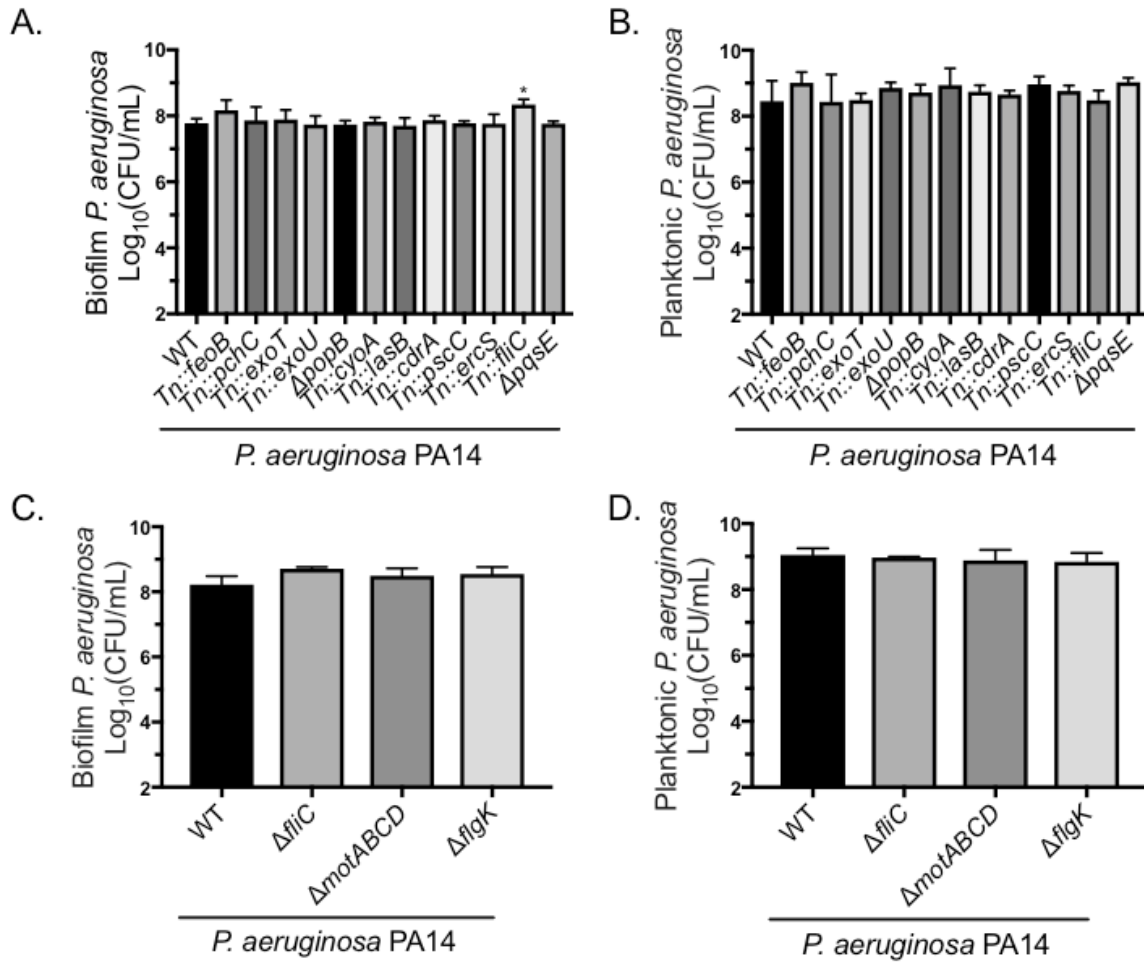

110

111 **Figure S10. *P. aeruginosa* PA14 mutants do not have growth defects.** Growth of *P. aeruginosa*

112 PA14 mutants after 16 hours co-culture on plastic with *S. aureus* JE2 in MEM L-gln L-arg. **A)**

113 Biofilm and **B)** planktonic fractions for initial mutant screen. **C)** Biofilm and **D)** planktonic

114 fractions for flagellar mutant screen. Significance determined by one-way ANOVA with

115 Dunnett's post-test comparison to wild-type *P. aeruginosa* PA14. \*p<0.05.

116

117

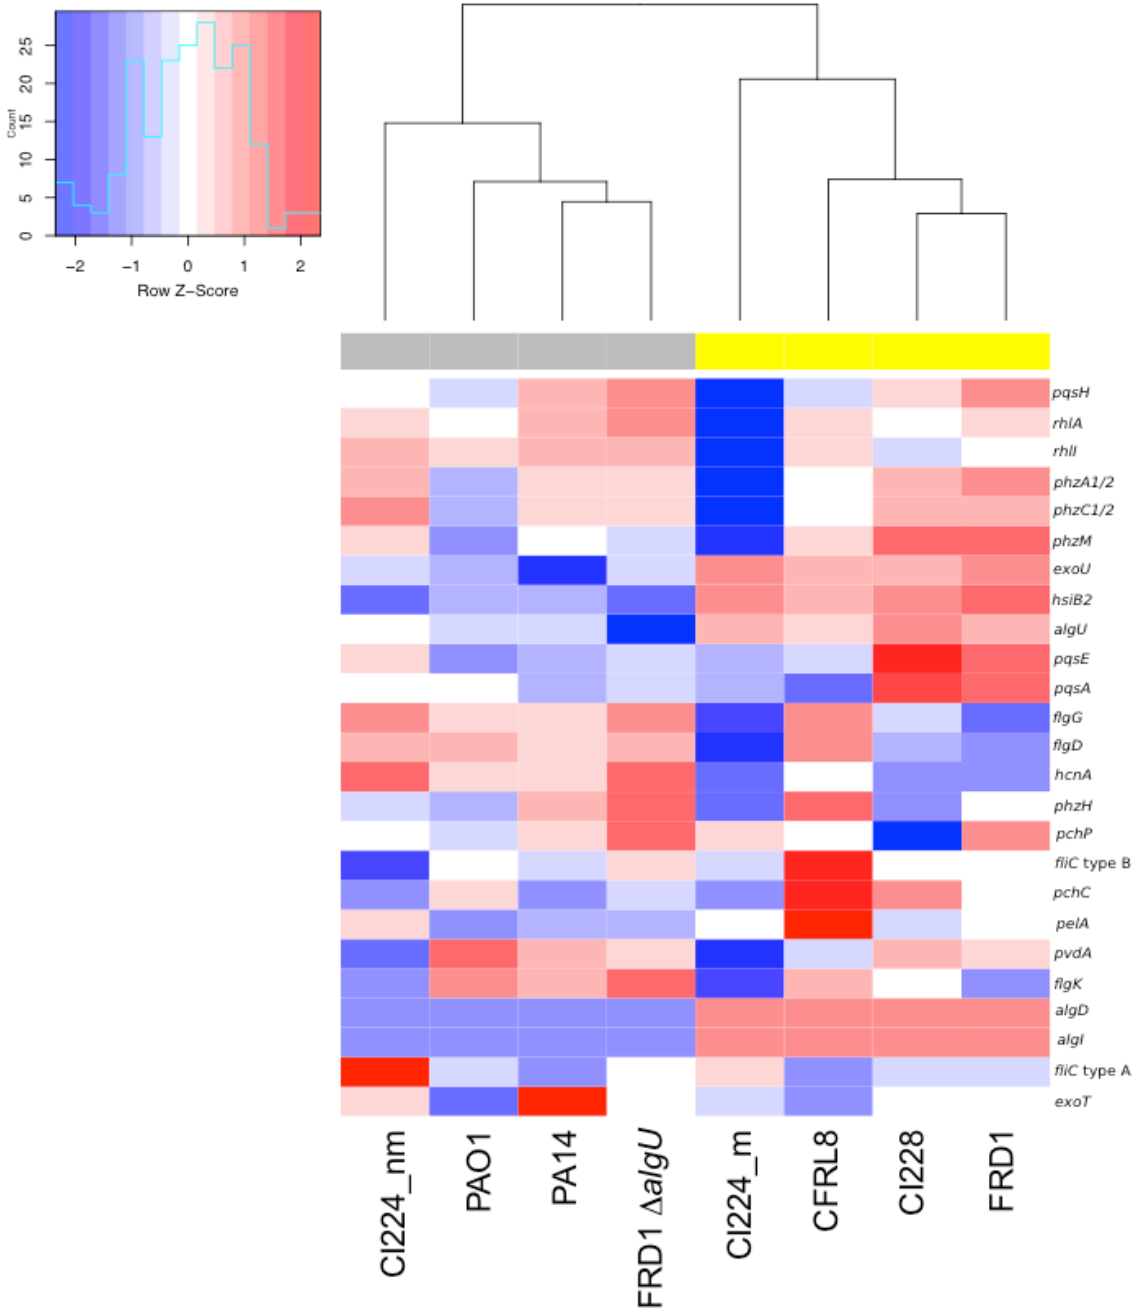

118

119 **Figure S11. Gene expression of *P. aeruginosa* clinical isolates and nonmucoid revertants.**

120 Heatmap and dendrogram of a subset of genes in the Nanostring codeset from *P. aeruginosa*

121 clinical isolates cultured in lysogeny broth (LB) for 8-11 hours (Gifford AH, Willger SD, Dolben

122 EL, Moulton LA, Dorman DB, Bean H, Hill JE, Hampton TH, Ashare A, Hogan DA. 2016. Infect

123 Immun 84:2995–3006.). Log<sub>2</sub> transformation of Nanostring counts were normalized to positive

124 controls from a single biological replicate. Expression values are displayed as within-row Z-  
125 scores. Yellow indicates mucoid strains, and gray indicates non-mucoid strains. Image  
126 generated in R with Heatmap.2 function. This dataset contains expression data for the isogenic  
127 nonmucoid revertants of *P. aeruginosa* FRD1 and *P. aeruginosa* CI2224. Here we display a direct  
128 comparison of gene expression for these six clinical isolates and two laboratory *P. aeruginosa*  
129 strains of a subset of genes in the Nanostring codeset. Interestingly, isolates cluster primarily on  
130 mucoidy, and the mucoid isolates which were better able to kill *S. aureus* (*P. aeruginosa* FRD1  
131 and *P. aeruginosa* CI228) clustered together within those groups. Mucoid *P. aeruginosa* FRD1  
132 decreases some genes as expected given its mucoid phenotype, including *flgG*, *flgD*, *flgK*, and  
133 *fliC*. However, *rhIA*, *phz*, and *pvdA* expression remain high; all of these genes are known to  
134 contribute to the ability of *P. aeruginosa* to kill *S. aureus* in co-culture (24, 32, 33, 57–59). *P.*  
135 *aeruginosa* CI228 has a similar gene expression pattern to *P. aeruginosa* FRD1, but *pvdA*  
136 expression is even higher in this strain. *P. aeruginosa* CI2224, which is similar to *P. aeruginosa*  
137 CFBRPA32 in the ability to kill *S. aureus* (that is, both strains show limited ability to kill *S.*  
138 *aureus*) downregulates a large number of genes coding for known virulence factors, including  
139 those genes required for the production of rhamnolipids (*rhIA*, *rhII*), phenazines (*phzA*, *phzC*),  
140 quorum sensing factors (*pqsH*, *pqsA*), and flagella (*flgD*, *flgG*, *fliC*). It is not immediately clear  
141 based on these data why this isolate is able to kill *S. aureus* at the late time points. *P.*  
142 *aeruginosa* CFRL8, which is the poorest of these four strains at killing *S. aureus*, highly expresses  
143 *pchC* and *fliC*, but has lower *pqsA* expression relative to the other strains. To determine  
144 whether we could broadly correlate the expression of any particular genes with changes in  
145 virulence towards *S. aureus*, we plotted the expression of each gene against *S. aureus* survival

146 in co-culture at both 16 and 24 hours for each *P. aeruginosa* strain where we have Nanostring  
147 data and performed a linear regression (data not shown). We observed by this method that no  
148 individual gene's expression is significantly correlated with *S. aureus* survival. Taken together,  
149 these data suggest that across clinical mucoid strains, the relative production of a variety of  
150 transcripts such as those encoding pyoverdine, rhamnolipids, flagella, and phenazines  
151 determines whether isolates of *P. aeruginosa* effectively outcompete *S. aureus*, but the specific  
152 mechanisms vary on a strain-by-strain basis.



## SUPPLEMENTAL METHODS

**Alginate preparation and quantification.** *P. aeruginosa* PAO1 *mucA22* was cultured in 25mL TSB overnight shaking at 225 RPM and 37°C. Samples were mixed with equal volume of 0.85% saline, and debris were removed by centrifugation (12,000 *g* for 30 min). The culture supernatant was mixed with an equal volume of 2% cetyl pyridinium chloride, and the precipitated alginate was collected by centrifugation (12,000 *g* for 10 min at room temperature). The pellet was dissolved in 1 M NaCl, precipitated with isopropanol, and dissolved in a reduced volume of DI water to concentrate the samples. The pellet was precipitated again with cold isopropanol and dissolved in DI water. The concentration of alginate in solution was determined by the carbazole method described by Knutson and Jeanes (1), in which a solution of alginate (50  $\mu$ l, diluted with DI water to dynamic range of the assay) was mixed with 200  $\mu$ l of borate-sulfuric acid reagent (10 mM H<sub>3</sub>BO<sub>3</sub> in concentrated H<sub>2</sub>SO<sub>4</sub>) and 50  $\mu$ l of carbazole reagent (0.1% in ethanol). The mixture was then incubated at 100°C for 10 min, and absorbance at 550 nm was determined by spectrophotometer. The alginate concentration was determined by extrapolation from a standard curve (0 to 1 g/ml) of alginic acid from seaweed.

**Biofilm cultures.** Strains were centrifuged and resuspended in 1X MEM L-gln and each strain was inoculated at a final concentration of .05 OD/mL in 100 $\mu$ L total volume in a plastic 96-well plate. After 1 hour at 37°C with 5% CO<sub>2</sub>, 90 $\mu$ L of media was removed to select for surface-attached cells and replaced with fresh 1X MEM L-gln L-arg (for co-cultures with *P. aeruginosa* mutants) or ½X MEM +/- 1% alginate (for alginate-containing experiments). At the indicated time points, the planktonic fraction was removed plated to quantify CFU/ml. The biofilm

fraction was collected by adding 50ul of PBS + 0.1% Triton to each well and shaking for 30 minutes prior to plating for CFU/ml.

**Supernatant preparation.** Liquid cultures or the planktonic fraction of biofilm cultures were collected and centrifuged (2 min, 13,000 rpm) to remove cell debris. Supernatant was removed and sterilized by .22  $\mu$ m filtration.

**Siderophore Quantification.** 100uL of *P. aeruginosa* supernatants from each sample was aliquoted in triplicate in a 96-well flat-bottom plate. Relative fluorescence units were quantified at 400nm excitation and 460nm emission. Measurements were normalized to CFU/mL.

**Drop Collapse Assay.** *P. aeruginosa* supernatants were serially diluted  $\frac{1}{2}X$  in PBS and were scored as the reciprocal of the highest dilution at which the drop collapsed. Scores were normalized to CFU/mL.

**q-RT-PCR.** Media was removed from cultures (centrifuge 2 min, 14,000 rpm at 4°C) after 8 hours of culture. Cell pellets were immediately frozen in ethanol cooled with dry ice. RNA was isolated with TRIzol (Zymo Research) as described by the manufacturer. DNA was removed by three sequential treatments with Turbo-DNAse treatment (Invitrogen), and cDNA was prepared (RevertAid First Strand cDNA synthesis kit). Briefly, 1uL 100uM random hexamer primer was added to 600 ng RNA, and volume was adjusted to 12uL with nuclease-free water. RNA was incubated at 65°C for 5min and placed on ice for 1min. 4uL 5X reaction buffer and 2uL 10mM dNTPs were then added to each sample. 2uL water was added to NRT controls, and 1uL RiboLock RNase Inhibitor and 1uL RevertAid H Minus Reverse Transcriptase were added to non-NRT samples. cDNA was synthesized by the following protocol: 25°C 5 min, 50°C 60 min, 70°C 5 min.

**Supernatant Extraction Procedure for LC-MS/MS.** For detection of *P. aeruginosa* secondary metabolites, 100  $\mu$ L of supernatant was extracted with 500  $\mu$ L of 1:1 ethyl acetate:methanol (Fisher Scientific). After a 1 hr incubation at room temperature, the extraction was dried, resuspended in 100% methanol (Fisher Scientific) containing benzethonium, and centrifuged prior to analysis.

**LC-MS/MS Analysis.** Mass spectrometry was performed using a Bruker Daltonics Maxis II HD qTOF mass spectrometer equipped with a standard electrospray ionization source. The mass spectrometer was tuned by infusion of Tuning Mix ESI-TOF (Agilent Technologies) at a 3  $\mu$ L/min flow rate. For accurate mass measurements, a wick saturated with Hexakis (1H,1H,2H-difluoroethoxy) phosphazene ions (Synquest Laboratories, m/z 622.1978) located within the source was used as a lock mass internal calibrant. Samples were introduced by an Agilent 1290 Ultra Performance Liquid Chromatography (UPLC) system using a 5  $\mu$ L injection volume. Extracts were separated using a Phenomenex Kinetex 2.6 $\mu$ m C18 column (2.1 mm x 50 mm). A 9 minute linear water-acetonitrile gradient from 98:2 to 2:98 water:acetonitrile containing 0.1% formic acid was utilized. The flow rate was 0.5 mL/min. The mass spectrometer was operated in data dependent positive ion mode, automatically switching between full scan MS and MS/MS acquisitions. Full scan MS spectra (m/z 50 – 1500) were acquired in the TOF and the top five most intense ions in a particular scan were fragmented using collision induced dissociation using the stepping function in the collision cell.

**LC-MS/MS Feature Finding and Molecular Annotation.** LC-MS/MS data was converted from .d format to .mzXML format using Bruker Daltonics CompassXport after applying lock-mass calibration. Feature finding was performed on the .mzXML files using mzMine (version 2.39)

using the parameters listed in Supplemental Table 8 (2). As methanolic resuspension of the sample extracts was influenced by presence of alginate, sample features were normalized to the peak area of benzethonium ( $m/z$  412.3215), a standard present in the methanol. Features were annotated by comparing the exact mass and MS/MS spectra with reported values. Annotation of the features was validated by comparing the experimental data (exact mass, MS/MS, and retention time) to data acquired under identical conditions on a mixture of commercial standards for PYO (Sigma), PCA (Ark Pharm), HHQ (Ark Pharm), HQNO (Cayman Chemical), PQS (Chemodex), and rhamnolipids (AGAE Technologies, 90% pure). Annotation of these features is level 1 (3). Annotation of pyochelin is level 2, as a commercial standard is not available. All data including the raw files, mzXML files, metadata table, and feature analysis are available via MassIVE (accession number: MSV000084224). Statistical analyses of relative quantitation between samples were conducted in GraphPad Prism (v7.04).

**Nanostring.** Total RNA was prepared as described for q-RT-PCR from *P. aeruginosa* PA14 cultured for 8 hours in flasks in TSB +/- 0.25% alginate. Total RNA was also prepared from both *P. aeruginosa* PA14 and *P. aeruginosa* PAO1 prepared as follows: Cultures were grown to mid-log phase in flasks in 25mL TSB and then 10mL from each flask moved to a new flask containing 10mL TSB or 10mL TSB + 2% alginate, for a final concentration of 1% alginate. The previously published PAV2 codeset(4) was incubated with total RNA as described by the manufacturer's protocol. Briefly, two probes complementary to each transcript of interest are incubated with the RNA sample to allow for hybridization.

**Strains.** All strains are listed in Supplemental Table 9.

## Literature Cited.

1. Knutson CA, Jeanes A. 1968. A new modification of the carbazole analysis: application to heteropolysaccharides. *Anal Biochem* 24:470–481.
2. Pluskal T, Castillo S, Villar-Briones A, Orešič M. 2010. MZmine 2: Modular framework for processing, visualizing, and analyzing mass spectrometry-based molecular profile data. *BMC Bioinformatics* 11:395.
3. Sumner LW, Amberg A, Barrett D, Beale MH, Beger R, Daykin CA, Fan TW-M, Fiehn O, Goodacre R, Griffin JL, Hankemeier T, Hardy N, Harnly J, Higashi R, Kopka J, Lane AN, Lindon JC, Marriott P, Nicholls AW, Reily MD, Thaden JJ, Viant MR. 2007. Proposed minimum reporting standards for chemical analysis. Chemical Analysis Working Group (CAWG) Metabolomics Standards Initiative (MSI). *Metabolomics* 3:211–221.
4. Gifford AH, Willger SD, Dolben EL, Moulton LA, Dorman DB, Bean H, Hill JE, Hampton TH, Ashare A, Hogan DA. 2016. Use of a multiplex transcript method for analysis of *Pseudomonas aeruginosa* gene expression profiles in the cystic fibrosis lung. *Infect Immun* 84:2995–3006.
5. Rahme L, Stevens E, Wolfort S, Shao J, Tompkins R, Ausubel F. 1995. Common virulence factors for bacterial pathogenicity in plants and animals. *Science* (80- ) 268:1899–1902.
6. Holloway BW, Rossiter H, Burgess D, Dodge J. 1973. Aeruginocin tolerant mutants of *Pseudomonas aeruginosa*. *Genet Res* 22:239–53.
7. Mathee K, Ciofu O, Sternberg C, Lindum PW, Campbell JIA, Jensen P, Johnsen AH, Givskov M, Ohman DE, Soren M, Hoiby N, Kharazmi A. 1999. Mucoid conversion of *Pseudomonas aeruginosa* by hydrogen peroxide: a mechanism for virulence activation in the cystic

- fibrosis lung. *Microbiology* 145:1349–1357.
8. Limoli DH, Whitfield GB, Kitao T, Ivey ML, Davis MR, Grahl N, Hogan DA, Rahme LG, Howell PL, O'Toole GA, Goldberg JB. 2017. *Pseudomonas aeruginosa* alginate overproduction promotes coexistence with *Staphylococcus aureus* in a model of cystic fibrosis respiratory infection. *MBio* 8:e00186-17.
  9. Filkins LM, Graber JA, Olson DG, Dolben EL, Lynd LR, Bhuju S, O'Toole GA. 2015. Coculture of *Staphylococcus aureus* with *Pseudomonas aeruginosa* drives *S. aureus* towards fermentative metabolism and reduced viability in a cystic fibrosis model. *J Bacteriol* 197:2252–64.
  10. Rahim R, Ochsner UA, Olvera C, Graninger M, Messner P, Lam JS, Soberón-Chávez G. 2001. Cloning and functional characterization of the *Pseudomonas aeruginosa rhIC* gene that encodes rhamnosyltransferase 2, an enzyme responsible for di-rhamnolipid biosynthesis. *Mol Microbiol* 40:708–18.
  11. Limoli DH, Yang J, Khansaheb MK, Helfman B, Peng L, Stecenko AA, Goldberg JB. 2016. *Staphylococcus aureus* and *Pseudomonas aeruginosa* co-infection is associated with cystic fibrosis-related diabetes and poor clinical outcomes. *Eur J Clin Microbiol Infect Dis* 35:947–953.
  12. Ohman DE, Chakrabarty AM. 1981. Genetic mapping of chromosomal determinants for the production of the exopolysaccharide alginate in a *Pseudomonas aeruginosa* cystic fibrosis isolate. *Infect Immun* 33:142–8.
  13. Flynn JL, Ohman DE. 1988. Cloning of genes from mucoid *Pseudomonas aeruginosa* which control spontaneous conversion to the alginate production phenotype. *J Bacteriol*

170:1452–1460.

14. Ha D-G, Merritt JH, Hampton TH, Hodgkinson JT, Janecek M, Spring DR, Welch M, O'Toole GA. 2011. 2-Heptyl-4-quinolone, a precursor of the *Pseudomonas* quinolone signal molecule, modulates swarming motility in *Pseudomonas aeruginosa*. *J Bacteriol* 193:6770–80.
15. Patankar YR, Lovewell RR, Poynter ME, Jyot J, Kazmierczak BI, Berwin B. 2013. Flagellar motility is a key determinant of the magnitude of the inflammasome response to *Pseudomonas aeruginosa*. *Infect Immun* 81:2043–52.
16. Toutain CM, Zegans ME, O'Toole GA. 2005. Evidence for two flagellar stators and their role in the motility of *Pseudomonas aeruginosa*. *J Bacteriol* 187:771–777.
17. Ha D-G, Richman ME, O'Toole GA. 2014. Deletion mutant library for investigation of functional outputs of cyclic diguanylate metabolism in *Pseudomonas aeruginosa* PA14. *Appl Environ Microbiol* 80:3384.
18. McClure CD, Schiller NL. 1996. Inhibition of macrophage phagocytosis by *Pseudomonas aeruginosa* rhamnolipids *in vitro* and *in vivo*. *Curr Microbiol* 33:109–17.
